# Supplementary material
Source: publisher figshare collection journal article supplement (https://acs.figshare.com/ndownloader/files/10270785)
Supplement: Supplementary file 1 [file 10270785]

# SUPPLEMENTARY INFORMATION

## Recurrent Neural Network Model for Constructive Peptide Design

*Alex T. Müller, Jan A. Hiss, Gisbert Schneider\**

Swiss Federal Institute of Technology (ETH), Department of Chemistry and Applied  
Biosciences, Vladimir-Prelog-Weg 4, CH-8093 Zurich, Switzerland

\*email: [gisbert@ethz.ch](mailto:gisbert@ethz.ch)

**Table S1.** Five-fold cross-validation loss (CV loss) obtained for all tested architectures trained for 200 epochs. In each fold, weights were initialized with a different random seed.

| Layers | Neurons | Dropout | Best epoch | CV loss |
|--------|---------|---------|------------|---------|
| 2      | 256     | 0.2     | 167        | 0.562   |
| 1      | 256     | 0.2     | 153        | 0.574   |
| 2      | 128     | 0.1     | 159        | 0.577   |
| 2      | 128     | 0.2     | 199        | 0.580   |
| 1      | 512     | 0.1     | 118        | 0.592   |
| 2      | 256     | 0.1     | 119        | 0.593   |
| 1      | 128     | 0.1     | 199        | 0.594   |
| 1      | 256     | 0.1     | 108        | 0.602   |
| 2      | 64      | 0.1     | 198        | 0.621   |
| 1      | 128     | 0.2     | 198        | 0.630   |
| 2      | 512     | 0.2     | 197        | 0.639   |
| 1      | 512     | 0.2     | 144        | 0.642   |
| 2      | 48      | 0.1     | 199        | 0.672   |
| 1      | 64      | 0.1     | 199        | 0.678   |
| 2      | 512     | 0.1     | 189        | 0.687   |
| 2      | 64      | 0.2     | 199        | 0.691   |
| 1      | 64      | 0.2     | 199        | 0.717   |
| 1      | 48      | 0.1     | 199        | 0.724   |
| 2      | 48      | 0.2     | 197        | 0.743   |
| 2      | 32      | 0.1     | 198        | 0.750   |
| 1      | 48      | 0.2     | 199        | 0.763   |
| 1      | 32      | 0.1     | 199        | 0.793   |
| 2      | 24      | 0.1     | 198        | 0.808   |
| 1      | 32      | 0.2     | 199        | 0.813   |
| 1      | 24      | 0.1     | 199        | 0.824   |
| 2      | 32      | 0.2     | 199        | 0.831   |
| 1      | 24      | 0.2     | 199        | 0.861   |
| 2      | 24      | 0.2     | 199        | 0.879   |

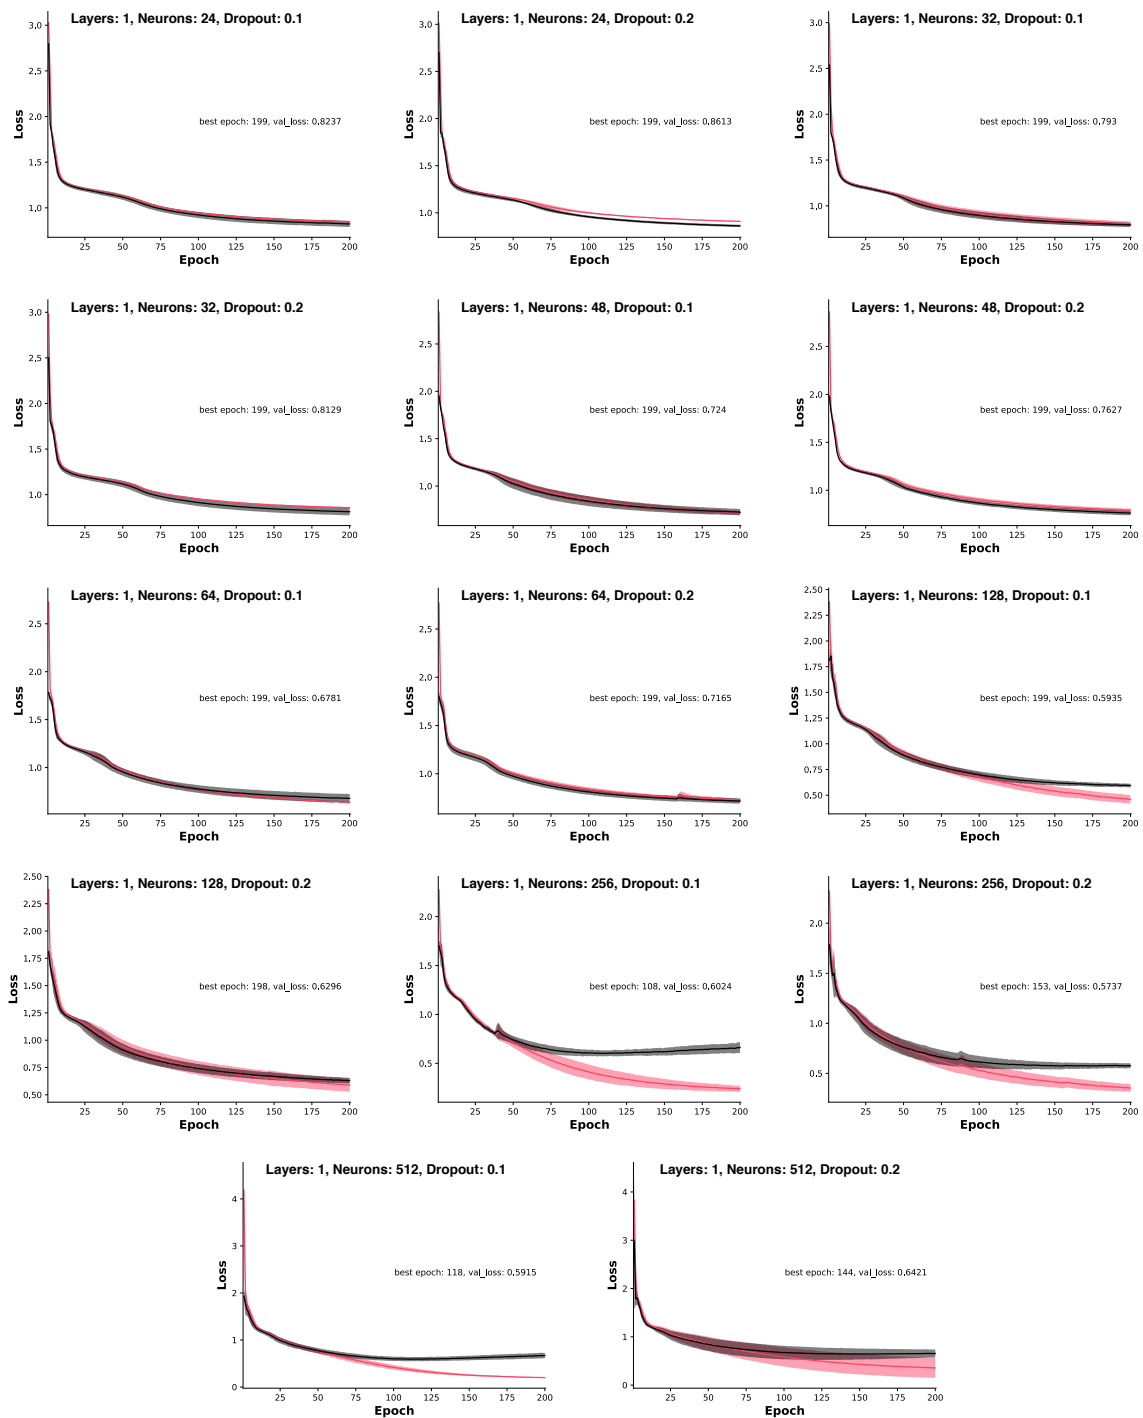

**Figure S1.** Five-fold cross-validation loss curves for all tested architectures with one layer.

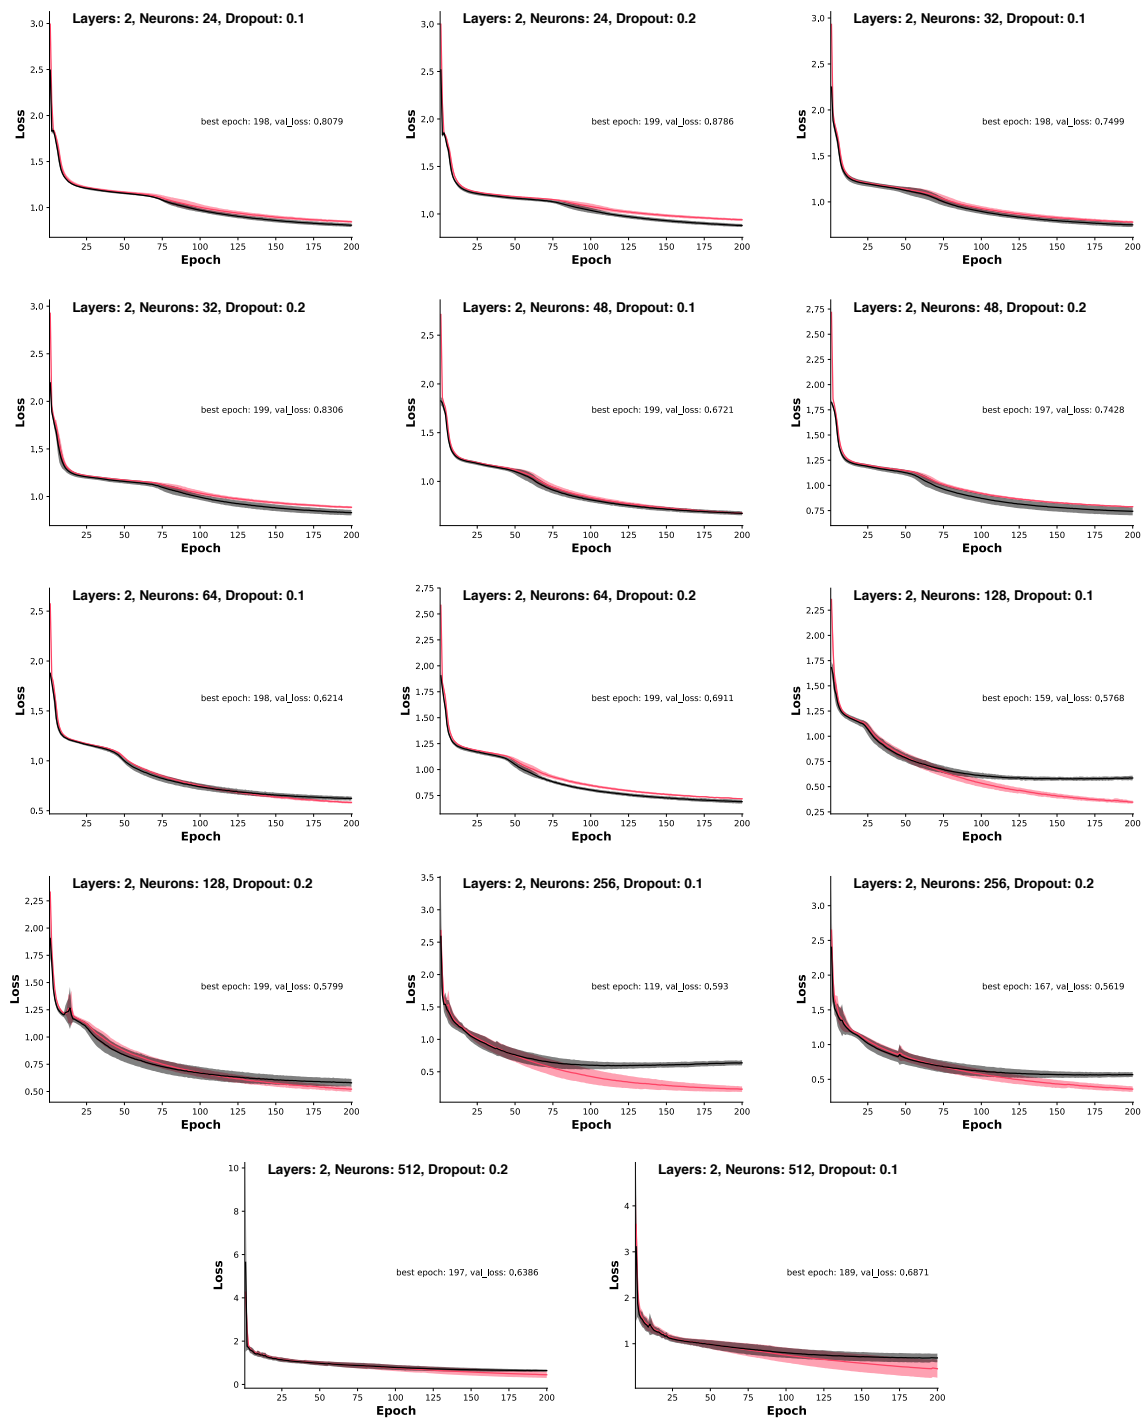

**Figure S2.** Five-fold cross-validation loss curves for all tested architectures with two layers.

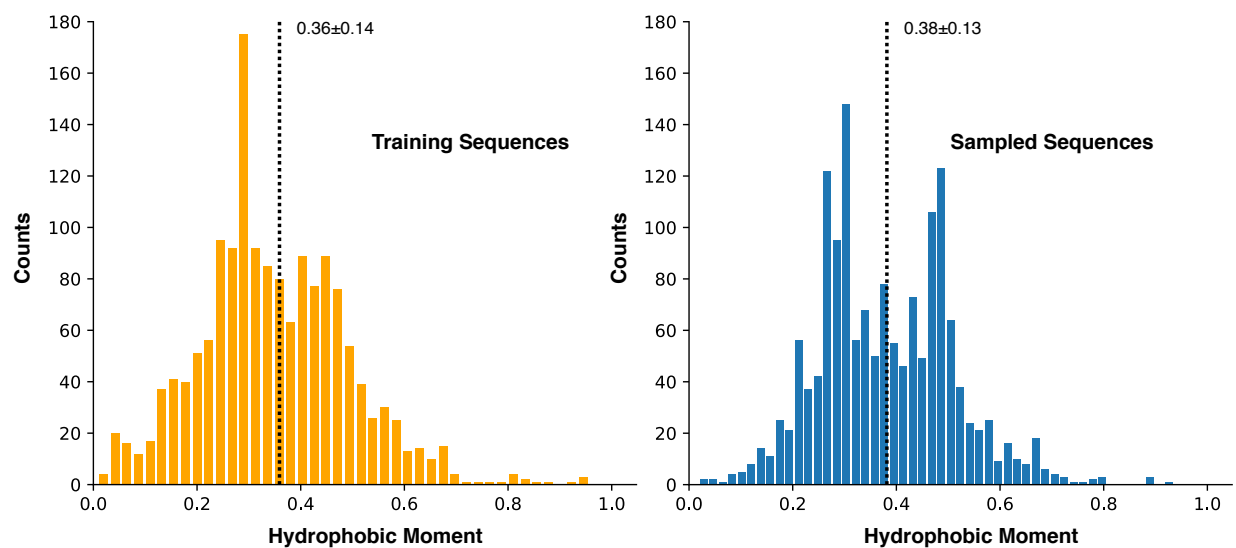

**Figure S3.** Histograms of the hydrophobic moment distribution of both training (left, orange) and sampled (right, blue) sequences. Dashed lines depict the average value.
